# Supplementary material
Source: publisher site journal article supplement (https://www.dovepress.com/article/295549)
Supplement: Supplementary file 1 [file get_supplementary_file.php]

| **Supplementary information file**  **Additional File 1:**  Search Strategy |
| --- |
| 1. Primary health care/ |
| 2. Family practice/ |
| 3. General practice/ |
| 4. Primary care nursing/ |
| 5. General practitioners/ |
| 6. Physicians, Family/ |
| 7. Physicians, Primary Care/ |
| 8. ((general or family) adj2 (practice? or practitioner? or physician? or doctor?)).ti,ab. |
| 9. GP.ti,ab. |
| 10. (primary adj2 (care or health care or healthcare or medical care or patient care)).ti,ab. |
| 11. 1 or 2 or 3 or 4 or 5 or 6 or 7 or 8 or 9 or 10 |
| 12. Allied Health Occupations/ |
| 13. Allied Health Personnel/ |
| 14. (allied health adj (personnel or worker or professional?)).ti,ab. |
| 15. (occupational adj therap*).ti,ab. |
| 16. Occupational Therapists/ |
| 17. Physical Therapists/ |
| 18. (physiotherapy* or (physical adj therap*)).mp. |
| 19. Speech Therapy/ |
| 20. (speech adj2 (therap* or patholog*)).mp. |
| 21. (dietitian* or dietician*).mp. |
| 22. Nutritionists/ |
| 23. Pharmacists/ |
| 24. pharmacist*.ti,ab. |
| 25. Social Workers/ |
| 26. (social adj2 work*).ti,ab. |
| 27. Psychologist*.ti,ab. |
| 28. Case Managers/ |
| 29. Podiatry/ |
| 30. 12 or 13 or 14 or 15 or 16 or 17 or 18 or 19 or 20 or 21 or 22 or 23 or 24 or 25 or 26 or 27 or 28 or 29 |
| 31. Interdisciplinary Communication/ |
| 32. Communication/ |
| 33. Health Communication/ |
| 34. Health Communication Systems/ |
| 35. Hospital Communication Systems/ |
| 36. Intersectoral collaboration/ |
| 37. Interprofessional relations/ |
| 38. ((multidisciplin* or multi-profession* or inter-disciplin* or interdisciplin* |
| or interprofession* or inter-profession* or transdisciplin* or trans-disciplin*) adj communication).ti,ab. |
| 39. ((multidisciplin* or multi-profession* or inter-disciplin* or interdisciplin* or interprofession* |
| or inter-profession* or transdisciplin* or trans-disciplin*) adj collaboration).ti,ab. |
| 40. (communication* or collaborat* or interact* or partnership*).ti,ab. |
| 41. (verbal or nonverbal* or non-verbal*).mp. |
| 42. (team* adj collaborat*).ti,ab. |
| 43. 31 or 32 or 33 or 34 or 35 or 36 or 37 or 38 or 39 or 40 or 41 or 42 |
| 44. 11 and 30 and 43 |
